# Supplementary material for: Blockade of α4 integrins reduces leukocyte–endothelial interactions in cerebral vessels and improves memory in a mouse model of Alzheimer’s disease
Source: PubMed Central journal article supplement (PMC6700124; doi:10.1038/s41598-019-48538-x), 2019-08-19
Supplement: 41598_2019_48538_MOESM1_ESM.pdf [file 41598_2019_48538_MOESM1_ESM.pdf]

## Supplementary Information

### **Blockade of $\alpha 4$ integrins reduces leukocyte–endothelial interactions in cerebral vessels and improves memory in a mouse model of Alzheimer’s disease**

Enrica Pietronigro<sup>1\*</sup>, Elena Zenaro<sup>1\*</sup>, Vittorina Della Bianca<sup>1</sup>, Silvia Dusi<sup>1</sup>, Eleonora Terrabuio<sup>1</sup>, Giulia Iannoto<sup>1</sup>, Anna Slanzi<sup>1</sup>, Somayehsadat Ghasemi<sup>1</sup>, Rajasekar Nagarajan<sup>1</sup>, Gennj Piacentino<sup>1</sup>, Gabriele Tosadori<sup>1,2</sup>, Barbara Rossi<sup>1</sup>, Gabriela Constantin<sup>1,2,3</sup>

<sup>1</sup>Department of Medicine, University of Verona, 37134 Verona, Italy

<sup>2</sup>The Center for Biomedical Computing (CBMC), University of Verona, 37134 Verona, Italy

\*These authors equally contributed to this work

<sup>3</sup>Address correspondence to: Prof. Gabriela Constantin, Department of Medicine, Section of General Pathology, University of Verona, Strada le Grazie 8, Verona 37134, Italy; Phone: +39-045-8027102; Email: gabriela.constantin@univr.it

*Running title: Role of  $\alpha 4$  integrins in Alzheimer’s disease*

*Keywords: leukocyte trafficking, Alzheimer’s disease,  $\alpha 4$  integrins, in vivo imaging, therapeutic approaches*

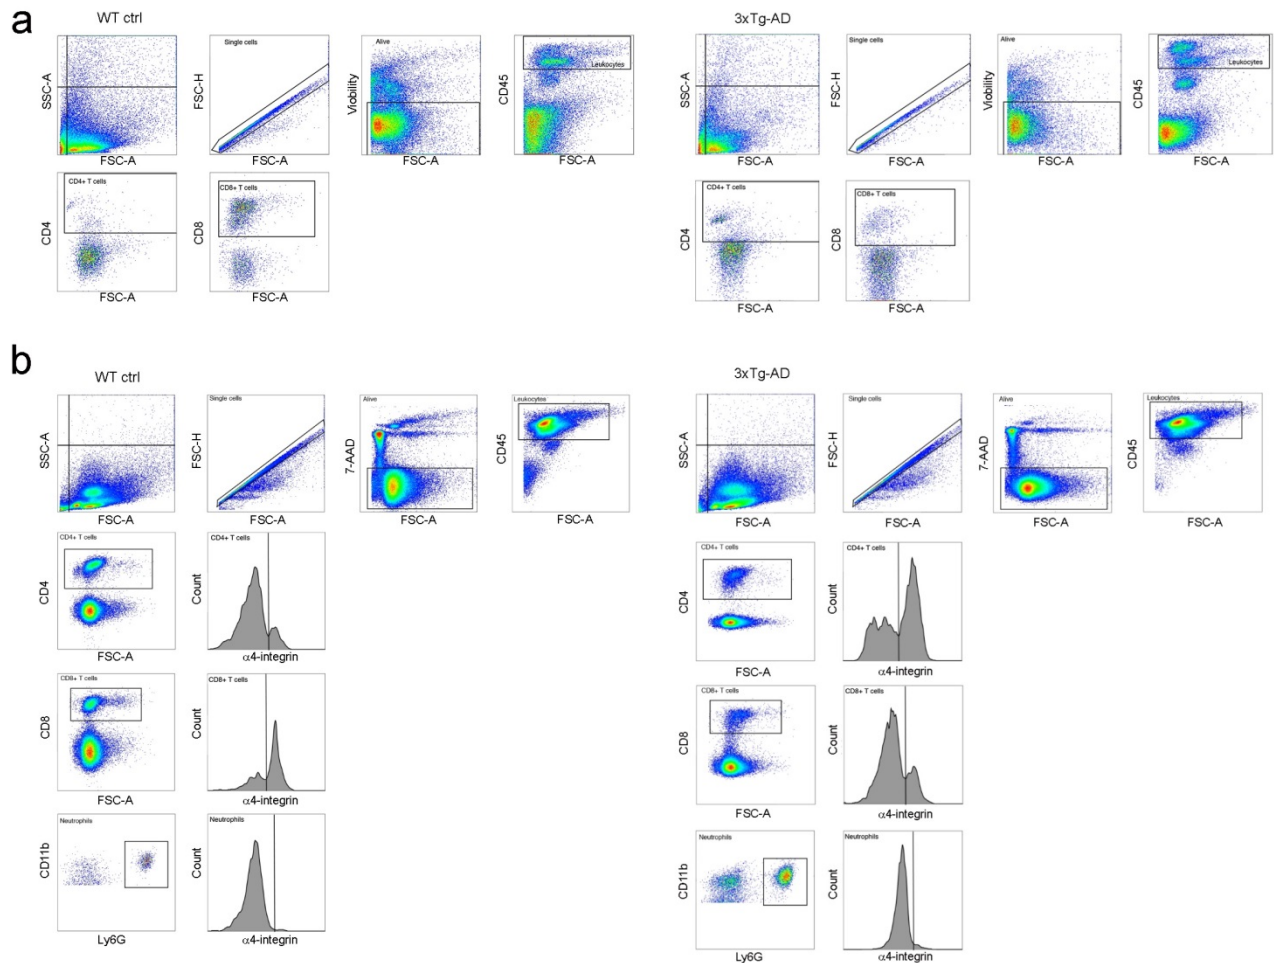

### Supplementary Figure 1. Gating strategies for flow cytometry experiments.

Representative gating strategy used during FACS analysis for the identification of **(a)** brain-infiltrating CD45<sup>+</sup> cells and **(b)** peripheral leukocytes in wild-type control (WT ctrl) and 3xTg-AD mice by simultaneous labeling with antibodies recognizing lymphocyte and neutrophil markers. Doublets were removed from the analysis by the sub-gate identification of singlets using FSC-A and FSC-H. **a)** Dead cells were removed from the analysis using Viability 405/520 fixable dye. CD45<sup>high</sup> cells were sub-gated using FSC-A plus a CD4 double gate to define CD4<sup>+</sup> T cells, and FSC-A plus a CD8 double gate to define CD8<sup>+</sup> T cells. **b)** Dead cells were removed from the analysis using 7AAD. CD4<sup>+</sup> and CD8<sup>+</sup> T cells were identified by gating on CD45<sup>+</sup> cells, whereas Ly6G<sup>+</sup> neutrophils were detected by gating CD11b/Ly6G on CD45<sup>+</sup> leukocytes. The  $\alpha$ 4 integrin expression in each population (CD8<sup>+</sup> T cells, CD4<sup>+</sup> T cells and Ly6G<sup>+</sup> neutrophils) is shown in the histograms.

**Supplementary Table I. Effect size statistics**

| <b>FACS analysis (WT ctrl vs 3xTg-AD)</b>                                     | <b>Cohen's <i>d</i></b> | <b>Magnitude</b> |
|-------------------------------------------------------------------------------|-------------------------|------------------|
| <b>Brain</b>                                                                  |                         |                  |
| % of CD4 <sup>+</sup> cells on CD45 <sup>high</sup> (6 months)                | -0.3924413              | Small            |
| % of CD4 <sup>+</sup> cells on CD45 <sup>high</sup> (9 months)                | -1.938403               | Large            |
| % of CD8 <sup>+</sup> cells on CD45 <sup>high</sup> (6 months)                | -0.05060928             | Negligible       |
| % of CD8 <sup>+</sup> cells on CD45 <sup>high</sup> (9 months)                | 2.790802                | Large            |
| <b>Blood</b>                                                                  |                         |                  |
| % α4 integrin <sup>+</sup> CD4 <sup>+</sup> cells (6 months)                  | -2.75399                | Large            |
| % α4 integrin <sup>+</sup> CD4 <sup>+</sup> cells (9 months)                  | -2.195376               | Large            |
| MFI α4 integrin <sup>+</sup> expression on CD4 <sup>+</sup> cells (6 months)  | 0.2582844               | Small            |
| MFI α4 integrin <sup>+</sup> expression on CD4 <sup>+</sup> cells (9 months)  | -6.414628               | Large            |
| % α4 integrin <sup>+</sup> CD8 <sup>+</sup> cells (6 months)                  | 1.356608                | Large            |
| % α4 integrin <sup>+</sup> CD8 <sup>+</sup> cells (9 months)                  | 1.175441                | Large            |
| MFI α4 integrin <sup>+</sup> expression on CD8 <sup>+</sup> cells (6 months)  | 0.6933269               | Medium           |
| MFI α4 integrin <sup>+</sup> expression on CD8 <sup>+</sup> cells (9 months)  | 0.3108755               | Small            |
| % α4 integrin <sup>+</sup> Ly6G <sup>+</sup> cells (6 months)                 | 0.1284168               | Negligible       |
| % α4 integrin <sup>+</sup> Ly6G <sup>+</sup> cells (9 months)                 | -0.1840141              | Negligible       |
| MFI α4 integrin <sup>+</sup> expression on Ly6G <sup>+</sup> cells (6 months) | 0.9542835               | Large            |
| MFI α4 integrin <sup>+</sup> expression on Ly6G <sup>+</sup> cells (9 months) | 1.210988                | Large            |

| <b>IVM studies</b>                                       | <b>Cohen's <i>d</i></b> | <b>Magnitude</b> |
|----------------------------------------------------------|-------------------------|------------------|
| <b>Digital</b>                                           |                         |                  |
| Number of interacting cells ≤ Vcrit (WT ctrl vs 3xTg-AD) | -2.835166               | Large            |
| % of interacting cells ≤ Vcrit (Untreated vs Anti-α4)    | 1.582386                | Large            |
| % of interacting cells ≤ Vcrit (Untreated vs Isotype)    | -0.2805429              | Small            |
| <b>Analog</b>                                            |                         |                  |
| % of leukocyte rolling (Untreated vs Anti-α4)            | 1.283774                | Large            |
| % of leukocyte rolling (Untreated vs Isotype)            | 0.5024471               | Medium           |

| <b>Behavioral tests</b>            | <b>Cohen's <i>d</i></b> | <b>Magnitude</b> |
|------------------------------------|-------------------------|------------------|
| <b>Y maze</b>                      |                         |                  |
| % Alternation (WT ctrl vs 3xTg-AD) | 1.507574                | Large            |

|                                                                                     |           |        |
|-------------------------------------------------------------------------------------|-----------|--------|
| Isotype)                                                                            |           |        |
| % Alternation<br>(3xTg-AD Isotype vs 3xTg-AD Anti- $\alpha$ 4)                      | -1.209133 | Large  |
| <b>CFC</b>                                                                          |           |        |
| % Freezing (WT ctrl vs 3xTg-AD Isotype)                                             | 1.343395  | Large  |
| % Freezing<br>(3xTg-AD Isotype vs 3xTg-AD Anti- $\alpha$ 4)                         | -1.058881 | Large  |
| <b>MWM</b>                                                                          |           |        |
| Escape latency (WT ctrl vs 3xTg-AD Isotype)                                         | 0.7383913 | Medium |
| Escape latency<br>(3xTg-AD Isotype vs 3xTg-AD Anti- $\alpha$ 4)                     | 1.307888  | Large  |
| Platform location crossing<br>(WT ctrl vs 3xTg-AD Isotype)                          | 1.487006  | Large  |
| Platform location crossing<br>(3xTg-AD Isotype vs 3xTg-AD Anti- $\alpha$ 4)         | -1.553772 | Large  |
| Latency to cross platform location<br>(WT ctrl vs 3xTg-AD Isotype)                  | -2.243153 | Large  |
| Latency to cross platform location<br>(3xTg-AD Isotype vs 3xTg-AD Anti- $\alpha$ 4) | 1.247004  | Large  |

| <b>Neuropathology (Isotype vs Anti-<math>\alpha</math>4)</b> | <b>Cohen's <i>d</i></b> | <b>Magnitude</b> |
|--------------------------------------------------------------|-------------------------|------------------|
| <b>Treatment at 6 months</b>                                 |                         |                  |
| Area Cortex Iba-1                                            | 0.1447865               | Negligible       |
| Area CA1 Iba-1                                               | 0.2103128               | Small            |
| Area CA1 6E10                                                | 0.9596423               | Large            |
| Area CA1 HT7                                                 | 0.2634473               | Small            |
| Area CA1 AT180                                               | 1.321709                | Large            |
| <b>Treatment at 9 months</b>                                 |                         |                  |
| Area Cortex Iba-1                                            | 0.647467                | Medium           |
| Area Cortex 6E10                                             | 0.9800084               | Large            |
| Area CA1 HT7                                                 | -0.2208119              | Small            |
| Area CA1 AT180                                               | 1.408082                | Large            |

The magnitude was assessed using the thresholds provided by Cohen (1992)<sup>1</sup>, i.e.  $d < 0.2$  negligible,  $d < 0.5$  small,  $d < 0.8$  medium, otherwise large

## **Supplementary Methods**

### **Isolation of brain leukocytes and flow-cytometry analysis**

Mice were anesthetized and perfused through the left cardiac ventricle by injecting cold PBS. The brain was digested with 20 U/ml of DNaseI and 1 mg/ml collagenase at 37°C for 45 min. Cells were isolated by passing the digested tissue through a 70- $\mu$ m cell strainer. They were then resuspended in 30% Percoll and loaded onto 70% Percoll. The tubes were centrifuged at 1300  $\times$  g for 20 min at 4°C. Cells were removed from the interphase, washed and labeled with the following anti-mouse antibodies: anti-CD45-PE, anti-CD11b-PE-Vio770, anti-Ly6G-APC-Vio770, anti-CD3 PerCP-Vio700, anti-CD8a VioBright-FITC, and anti-CD4 VioBlue. Cells were acquired by flow cytometry with MACSQuant Analyzer (Miltenyi Biotec). Data were analyzed using FlowJo software.

## **Supplementary Reference**

1. Cohen, J. A power primer. *Psychol Bull.* **112**, 155-159 (1992).
